# Supplementary material for: Formation of mesoporous calcium sulfate microspheres through phase conversion in controlled calcination
Source: Royal Society of Chemistry journal article supplement (doi:10.1039/c6ra17425f), 2016-01-01
Supplement: c6ra17425f1.pdf [file c6ra17425f1.pdf]

## **Electronic Supplementary Information**

### **Formation of mesoporous calcium sulfate microspheres through phase conversion in controlled calcination**

**Qiaoshan Chen,<sup>a</sup> Mengqian Qian,<sup>a</sup> Caiyun Jia,<sup>a</sup> Junming Lin,<sup>a</sup> Guangming Jiang<sup>b</sup> and Baohong Guan<sup>\*a</sup>**

<sup>a</sup> Department of Environmental Engineering, Zhejiang University, Hangzhou 310058, China

<sup>b</sup> Engineering Research Center for Waste Oil Recovery Technology and Equipment, Chongqing Technology and Business University, Chongqing 400067, China

\* Corresponding author. Tel.: +86-0571-88982026; Fax: +86-0571-88982026.

E-mail address: [guanbaohong@zju.edu.cn](mailto:guanbaohong@zju.edu.cn)

## **Experimental**

### **Reagents and materials**

Analytic reagent grade ethylene glycol (solvent), anhydrous  $(\text{NH}_4)_2\text{SO}_4$ , and  $\text{Na}_2\text{EDTA}$  were purchased from Sinopharm Chemical Reagent Co., Ltd. Shanghai, China. Analytic reagent grade anhydrous  $\text{CaCl}_2$  (Sigma-Aldrich Co., Llc. USA) and Ibuprofen (IBU, Tokyo Chemical Industry Co., Ltd. Tokyo, Japan) were used as received.

### **Synthesis and calcination of $\alpha$ -HH microspheres**

Monodisperse  $\alpha$ -HH microspheres with a diameter of  $\sim 2 \mu\text{m}$  were synthesized by mixing 40 mM  $\text{CaCl}_2$  and  $(\text{NH}_4)_2\text{SO}_4$  solution in the presence of 10 mM  $\text{Na}_2\text{EDTA}$  at  $95^\circ\text{C}$  and the volume ratio of ethylene glycol to water (G/W) of 5.0.<sup>1</sup> Calcination of  $\alpha$ -HH microspheres were conducted to obtain mesoporous calcium sulfate microspheres at various temperatures from  $400^\circ\text{C}$  to  $800^\circ\text{C}$  (with a deviation of  $\pm 2^\circ\text{C}$ ) and times in programmable integrated electric furnace (SSXF-4-13Q, Lantian Co., Ltd. Hangzhou, China) in air as reaching the desired temperature. Samples were taken out immediately after given time and cooled at room temperature.

### **Adsorption of IBU**

The nonsteroidal analgesic and anti-inflammatory drug IBU<sup>2</sup> was chosen as model drug to test the drug loading capacity of mesoporous calcium sulfate microspheres. Typically, 0.2 g of mesoporous calcium sulfate microspheres was added into 20 mL of hexane solution at different IBU concentrations of 0.25, 0.50, 0.75, 1.00, 1.25 and 1.50 mg/mL at  $25^\circ\text{C}$ . The mixtures were ultrasonically treated for 2 min and soaked for 24 h with constant stirring in a conical flask which was sealed to prevent the

evaporation of hexane. The IBU-loaded mesoporous calcium sulfate microspheres were separated by centrifugation, washed with hexane for several times and then dried at 60°C for 12 h. The IBU loading amount was examined after the dissolution of calcium sulfate microspheres in phosphate buffered saline (PBS) by UV-vis spectroscopy at a wavelength of 264 nm.

### **Characterization**

The mesoporous calcium sulfate microspheres were examined by a powder X-ray diffractometer (XRD, D/Max-2550 pc, Rigaku Inc., Tokyo, Japan) with Cu K $\alpha$  radiation at a scanning rate of 2°/min in the  $2\theta$  range from 5° to 80°, thermogravimetry/differential scanning calorimetry analysis (TG/DSC, NETZSCH STA 409 Luxx, Selb/Bavaria, Germany) and Fourier transform infrared analysis (FTIR, IRAffinity-1, Shimadzu, Japan) over the frequency range of 400-4000 cm<sup>-1</sup> for phase and composition identification. The morphology evolution was observed by field emission scanning electron microscopy (FESEM, SU8010, Hitachi, Tokyo, Japan). The porous properties of the products were measured by N<sub>2</sub> adsorption at -195.8°C on a specific surface area and porosity analyzer (Micromeritics, ASAP2020M, USA). UV-visible spectra were conducted to analyze the IBU concentration on a UV-visible spectrophotometer (UV-vis, DRS: TU-1901, Shanghai, China).

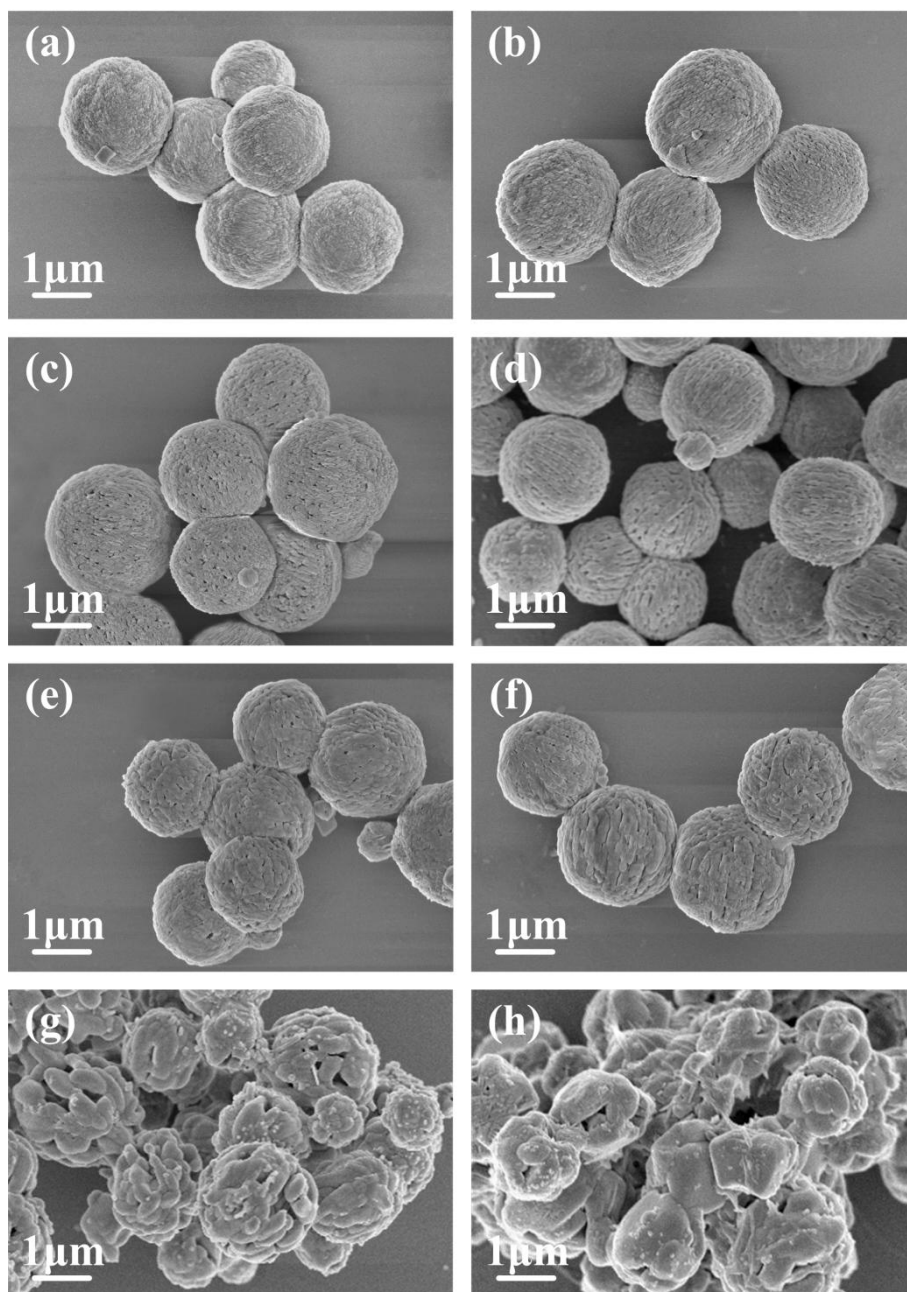

**Fig. S1** Low magnification FESEM images of as-formed  $\alpha$ -HH microspheres (a) and microspheres calcined at temperature of 200°C (b), 300°C (c), 400°C (d), 500°C (e), 600°C (f), 700°C (g) and 800°C (h) in air for 180 s.

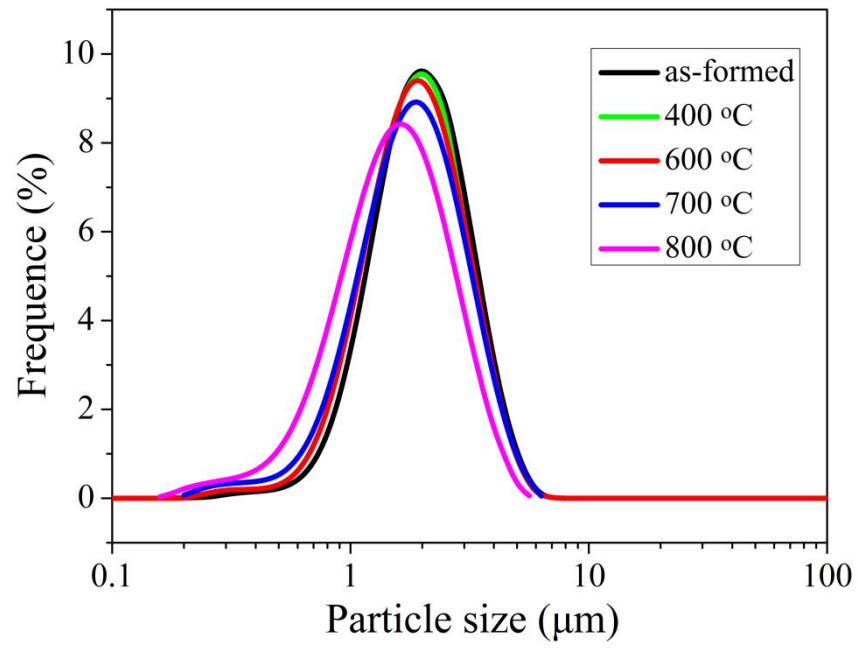

**Fig. S2** The particle size distributions of as-formed  $\alpha$ -HH microspheres and microspheres calcined at temperature of 400°C, 600°C, 700°C and 800°C in air for 180 s.

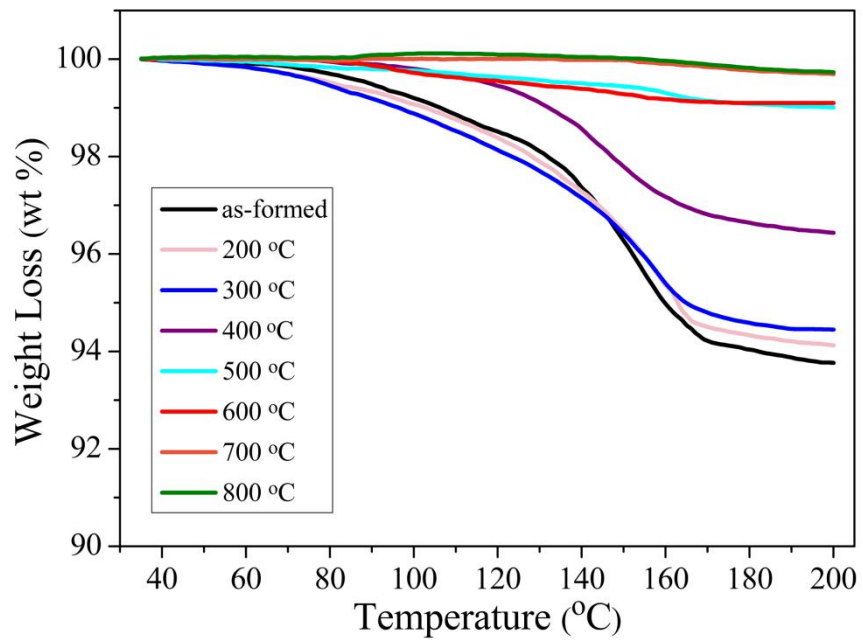

**Fig. S3** TG curves of as-formed  $\alpha$ -HH microspheres and microspheres at temperatures from 200 to 800°C in air for 180 s.

**Table S1.** Surface areas of calcium sulfate microspheres calcined at different temperatures from 400 to 800°C in air for different times from 10 to 300 s.

| $T(^{\circ}\text{C}) \backslash t(\text{s})$ | 10    | 20    | 30    | 40    | 50    | 60    | 90    | 120   | 150   | 180   | 210   | 240   | 270   | 300   |
|----------------------------------------------|-------|-------|-------|-------|-------|-------|-------|-------|-------|-------|-------|-------|-------|-------|
| 400                                          | 3.21  | 4.08  | 6.11  | 7.48  | 8.52  | 9.66  | 10.23 | 12.89 | 15.57 | 18.3  | 20.15 | 22.7  | 16.34 | 13.75 |
| 500                                          | 2.18  | 3.77  | 6.69  | 8.22  | 13.48 | 15.43 | 24.87 | 30.62 | 25.41 | 20.67 | 18.16 | 10.78 | 7.63  | 4.43  |
| 600                                          | 3.21  | 5.67  | 11.5  | 12.64 | 16.35 | 17.39 | 26.48 | 17.94 | 14.71 | 9.19  | 7.19  | 5.57  | 3.42  | 2.38  |
| 700                                          | 11.02 | 15.7  | 23.71 | 21.04 | 18.36 | 15.21 | 12.78 | 10.24 | 7.26  | 5.8   | 4.01  | 3.28  | 2.13  | 2.09  |
| 800                                          | 18.59 | 16.36 | 15.33 | 14.71 | 12.56 | 11.63 | 8.68  | 5.13  | 4.05  | 2.9   | 2.45  | 1.9   | 1.54  | 1.27  |

## References

- 1 Q. Chen, G. Jiang, C. Jia, H. Wang and B. Guan, *CrystEngComm*, 2015, **17**, 8549-8554.
- 2 C. Hu, S. Liu, Y. Zhang, B. Li, H. Yang, C. Fan and W. Cui, *Acta Biomater.*, 2013, **9**, 7381-7388.
